# Supplementary material
Source: PubMed Central journal article supplement (PMC3485736)
Supplement: AEM.01623-12_zam999103774so1.pdf [file AEM.01623-12_zam999103774so1.pdf]

# 1 **Supplementary Material**

2

## 3 **Materials and Methods**

### 4 *Study site selection and biofilm substrate deployment*

5 The study area included a previously well-described water quality gradient (3, 17) comprising  
6 of 3 inner nearshore (< 10 km from the coast) and 2 outer nearshore (> 30 km) islands in the  
7 Whitsunday Islands, Central GBR (Table 1). Daydream, Pine and Double Cone Island  
8 (permanent sites of the long-term Reef Plan Marine Monitoring Program) are positioned inner  
9 nearshore subjected to higher nutrients and suspended sediments, and Deloraine and Edward  
10 Island, which are positioned outer nearshore less exposed to land runoff (3, 8, 15-17).

11 Standard glass microscope slides (75 x 25 mm) were used for biofilm settlement as these  
12 allow growth of very similar bacterial communities as those established on natural coral  
13 skeleton substrata, as discussed in (18). Initial settlement of bacteria as biofilm communities  
14 on different substrate types differs due to the physical properties of the substrata (7, 14),  
15 however, the effect of substrate type diminishes and bacterial communities become more  
16 similar over time (1, 7). Glass microscope slides were pre-cleaned with 70 % ethanol, rinsed  
17 with sterile water and fixed in polyvinyl chloride frames. Three replicate glass slides were  
18 deployed at 2 replicate sites (25 m apart) at each of the five islands. By SCUBA, frames were  
19 vertically mounted at 6 m water depth (below the lowest tide level) approximately 30 cm  
20 from the underlying sediment on steel pickets (covered by zip lock bags to avoid effects from  
21 leached iron) and secured by cable ties. Biofilms were developed repeatedly for ~48 d during  
22 2 replicate dry seasons (August, average seasonal temperature 22 °C) and 2 replicate wet  
23 seasons (January, average seasonal temperature 29 °C) over the course of two years (2008-  
24 2009 and 2009-2010 seasonal cycles). At the end of the study, this setup yielded 6 replicate  
25 samples per island and 60 per season (total of 120 samples). After ~48 d, biofilms were  
26 sampled for subsequent microbial community analyses by carefully scraping off the biofilm

27 material from the glass substrate into cryovials using sterile No. 11 scalpel blades (yield was  
28 usually ~4 g), immediately frozen in liquid nitrogen and stored at -80 °C until further  
29 processing.

30

### 31 *Water quality measurements*

32 Water quality here is defined by Chl *a* concentration, total suspended solids (TSS), Secchi  
33 depth, dissolved inorganic nitrogen (DIN, the sum of NH<sub>4</sub>, NO<sub>2</sub>, NO<sub>3</sub>), dissolved organic  
34 carbon (DOC) and the physical characteristics of temperature and salinity. Water quality  
35 samples were obtained monthly between 2008-2010 and analysed as described in detail in (3)  
36 and (12). In short, duplicate samples from two water depths at each location per sample time  
37 were analysed for DIN, TSS, Chl *a* and salinity. For particulate nutrients and Chl *a* analysis,  
38 water samples were collected on pre-combusted glass fibre filters and analysed after acetone  
39 extraction. TSS samples were collected on pre-weighed 0.4 µm polycarbonate filters and  
40 concentrations were determined gravimetrically. Salinity was determined using a Portasal  
41 Model 8410A Salinometer (Guildline). Light was measured with Odyssey light loggers  
42 equipped with wiping units as described in Uthicke & Altenrath (2010) and as light permitted,  
43 a Secchi disk depth reading was taken at each sampling site.

44

### 45 *Genomic DNA extraction, PCR amplification, cloning and sequencing*

46 Total DNA was extracted from 0.25 – 0.5 g of the biofilm (wet weight) sample using the  
47 MoBio UltraClean Soil Kit (MoBio Laboratories, Solana Beach, CA, USA) according to the  
48 manufacturer's protocol with modifications as in Witt et al. (2011a). Bacterial 16S rRNA  
49 genes were amplified by PCR using 63F (5'-CAGGCCTAACACATGCAAGTC-3') and  
50 1389R primers (5'-ACGGGCGGTGTGTACAAG-3') (Sigma-Proligo, The Woodlands, TX,  
51 USA) (9). Each biofilm sample was amplified in triplicate 25 µl reactions containing 2.5 µM  
52 non-acetylated bovine serum albumin (New England Biolabs, USA), 2 µM (2 mM each)

53 dNTP (Astral Scientific, Australia), 2.5  $\mu$ M forward primer 63F, 1.25  $\mu$ M reverse primer  
54 1389R, 1  $\mu$ M MgCl<sub>2</sub> (Qiagen), 1.25U HotStar Taq (Qiagen), 2.5  $\mu$ l HotStar Buffer (Qiagen,  
55 Germany) and ~2 ng of template DNA. Amplification was performed with an initial  
56 incubation at 95 °C for 15 min, followed by 30 cycles of 94 °C for 1 min, 55 °C for 1 min, 72  
57 °C for 1.30 min, and a final extension at 72 °C for 10 min.

58 Eight clone libraries of bacterial 16S rRNA genes amplified from DNA extracted from  
59 biofilms grown on glass substrate were constructed, and represent one library for each island  
60 (excluding Double cone) and season from year 2008-2009. DNA extracted from all six  
61 biofilm replicate samples from each island was then subject to PCR. Each sample was run in  
62 triplicates. For the construction of the eight clone libraries, replicates from each island were  
63 then pooled according to island and season. Pooled samples were purified using the  
64 MinELUTE PCR Clean-Up Kit (Qiagen) and cloned using a TOPO-TA Cloning Kit  
65 (Invitrogen, USA) according to the manufacturer's instructions. After blue-white screening,  
66 colonies were checked for correct insert size using a colony PCR method with the specific  
67 sequencing primer 63F. Randomly picked clones were dispersed in Luria-Bertani (LB) media  
68 and 10 % glycerol in 96-well plate format and sent to the Australian Genome Research  
69 Facility Ltd. (Brisbane, Australia) for purification and sequencing by an ABI3730 XL  
70 Automatic DNA Sequencer.

#### 71 *Analysis of clone sequences*

72 Retrieved sequences were edited using Chromas Lite 2.33 (Technelysium Pty Ltd., Australia),  
73 saved as fasta files and submitted to the Greengenes NAST Aligner (for alignment of  
74 sequences to the Greengenes database) (4). 16S rRNA gene sequences were checked for  
75 chimeras using Bellerophon Version 3 (6), and chimeras were excluded from further analysis.  
76 The sequences were submitted to the Greengenes batch sequence classifier  
77 [<http://greengenes.lbl.gov/cgi-bin/nph-classify.cgi>] (11), and taxonomic assignments for each  
78 sequence were recorded using the NCBI taxonomy system. All sequences were deposited

79 under GenBank Accession numbers: JQ726882-JQ727208.

80

81 *Terminal Restriction Fragment Length Polymorphism (T-RFLP) analysis*

82 Bacterial 16S rRNA genes were PCR amplified using the same reaction mixture and  
83 conditions outlined for clone libraries, except that fluorescently labelled 5'-Cy5-63F (Sigma-  
84 Aldrich) forward and unlabelled 1389R reverse primers were used as stated in Witt et al.  
85 (2011). DNA template was diluted 1:10 in nuclease free water and cycling conditions were 32  
86 cycles of 94 °C for 1 min, 55 °C for 1 min, 72 °C for 1.3 min. After PCR, samples were  
87 prepared for T-RFLP analysis according to Witt et al. (2011a). Terminal restriction fragments  
88 (T-RFs) were resolved and visualized using the CEQ 8800 Genetic Analysis System  
89 (Beckman-Coulter, Fullerton, CA, USA) with a 600 bp size standard (Beckman-Coulter).  
90 Replicate samples were compared using the software T-align (13) with a range of 0.5 bp peak  
91 area to determine the consensus peaks between duplicates. The relative fluorescence intensity  
92 of the peak area of T-RFs was used as a relative abundance measure for T-RFs in further  
93 statistical analyses detailed below. For verification and identification of taxonomic identity of  
94 T-RFs, purified DNA from individual clones was also subject to PCR as stated above.

95 *Statistical analysis*

96 Bacterial community data (T-RF values) were square root transformed and standardised to  
97 relative abundances. Principal Component (PCA) analysis was used to determine whether  
98 bacterial assemblages group by location or season. The assemblage dissimilarities between  
99 location and season were tested by applying two-way Permutational Multivariate Analysis of  
100 Variance (PERMANOVA) based on permutation procedures (9999 permutations) using the  
101 Bray-Curtis distance measure and *p* values derived from Monte-Carlo (p(MC)) simulations.  
102 Pairwise t-tests were used as post hoc test. The contributions of each taxon to the total  
103 dissimilarities of treatments were analysed using the Similarity Percentage (SIMPER) routine  
104 and represented by vectors in the PCA. Double Cone Is. was excluded from the PCA, as

105 according to the water quality data we cannot clearly categorise this as an inner or outer  
106 nearshore island.  
107 Prior to analysis, environmental water quality data was averaged over sample seasons,  
108 locations and years and z-transformed (average = 0, sd = 1) to accommodate different  
109 measurement units of these parameters. To determine the relationship between water quality  
110 parameters and bacterial communities a distance-based redundancy (dbRDA) analysis was  
111 performed. The dbRDA was constrained by the statistically significant explanatory variables  
112 from multivariate multiple regression model (DistLM) marginal tests using a Bray-Curtis  
113 distance matrix based on permutation procedures (9999 permutations). As this procedure does  
114 not discriminate between location (or season) the data from Double Cone Island was  
115 included. Principal Component Analysis, PERMANOVA, DistLM and dbRDA (2, 10) were  
116 performed using the Primer 6.0 statistical software (2). To further determine significant  
117 differences between relative abundances (peak area) of contributing T-RFs, two-way Analysis  
118 of Variance (ANOVA) was performed using the Number Cruncher Statistical System 2007  
119 statistical software (NCSS, USA) (5).

## 120 **References**

- 121 **1. Chung, H. C., O. O. Lee, Y.-L. Huang, S. Y. Mok, R. Kolter, and P.-Y. Qian.**  
122 **2010. Bacterial community succession and chemical profiles of sub tidal biofilms**  
123 **in relation to larval settlement of the polychaete *Hydroides elegans*. *The ISME***  
124 ***Journal* 4:817-828.**
- 125 **2. Clarke, K., & Gorley, RN. 2006. PRIMER v6: User Manual/Tutorial. PRIMER-**  
126 **E, Plymouth.**
- 127 **3. Cooper, T. F., S. Uthicke, C. Humphrey, and K. E. Fabricius. 2007. Gradients in**  
128 **water column nutrients, sediment parameters, irradiance and coral reef**  
129 **development in the Whitsunday Region, central Great Barrier Reef. *Estuarine***  
130 ***Coastal and Shelf Science* 74:458-470.**
- 131 **4. DeSantis, T. Z., P. Hugenholtz, K. Keller, E. L. Brodie, N. Larsen, Y. M. Piceno,**  
132 **R. Phan, and G. L. Andersen. 2006. NAST: a multiple sequence alignment server**  
133 **for comparative analysis of 16S rRNA genes. *Nucleic Acids Research* 34:W394-**  
134 **W399.**
- 135 **5. Hintze, J. 2007. NCSS 2007. NCSS, LLC. Kaysville, Utah, USA. [www.ncss.com](http://www.ncss.com).**
- 136 **6. Huber, T., G. Faulkner, and P. Hugenholtz. 2004. Bellerophon: a program to**  
137 **detect chimeric sequences in multiple sequence alignments. *Bioinformatics***  
138 **20:2317-9.**

- 139 7. Huggett, M. J., B. T. Nedved, and M. G. Hadfield. 2009. Effects of initial surface  
140 wettability on biofilm formation and subsequent settlement of *Hydroides elegans*.  
141 *Biofouling* 25:387-399.
- 142 8. Kriwy, P., and S. Uthicke. 2011. Microbial diversity in marine biofilms along a  
143 water quality gradient on the Great Barrier Reef. *Systematic and Applied*  
144 *Microbiology* 34:116-126.
- 145 9. Marchesi, J. R., T. Sato, A. J. Weightman, T. A. Martin, J. C. Fry, S. J. Hiom,  
146 and W. G. Wade. 1998. Design and evaluation of useful bacterium-specific PCR  
147 primers that amplify genes coding for bacterial 16S rRNA. *Applied and*  
148 *Environmental Microbiology* 64:795-799.
- 149 10. McArdle, B. H., and M. J. Anderson. 2001. Fitting multivariate models to  
150 community data: a comment on distance-based redundancy analysis.  
151 *Ecology*:290-297.
- 152 11. McDonald, D., M. N. Price, J. Goodrich, E. P. Nawrocki, T. Z. DeSantis, A.  
153 Probst, G. L. Andersen, R. Knight, and P. Hugenholtz. 2011. An improved  
154 Greengenes taxonomy with explicit ranks for ecological and evolutionary  
155 analyses of bacteria and archaea. *ISME J*:doi:10.1038/ismej.2011.139.
- 156 12. Schaffelke, B., J. Carleton, J. Doyle, M. Furnas, K. Gunn, M. Skuza, M. Wright,  
157 and I. Zagorskis. 2010. Reef Rescue Marine Monitoring Program. Final Report  
158 of AIMS Activities – Inshore water quality monitoring 2009/10, Report for Reef  
159 and Rainforest Research Centre Australian Institute of Marine Science,  
160 Townsville:pp. 81.
- 161 13. Smith, C. J., Danilowicz, B. S., Clear, A. K., Costello, F. J., Wilson, B., Meijer, W.  
162 G. 2005. T-Align, a web-based tool for comparison of multiple terminal  
163 restriction fragment length polymorphism profiles. *Fems Microbiology Ecology*  
164 54:375-380.
- 165 14. Sweet, M. J., A. Croquer, and J. C. Bythell. 2011. Development of Bacterial  
166 Biofilms on Artificial Corals in Comparison to Surface-Associated Microbes of  
167 Hard Corals. *PLoS One* 6:e21195.
- 168 15. Uthicke, S., and C. Altenrath. 2010. Water column nutrients control growth and  
169 C : N ratios of symbiont-bearing benthic foraminifera on the Great Barrier Reef,  
170 Australia. *Limnology and Oceanography* 55:1681-1696.
- 171 16. Uthicke, S., and K. Nobes. 2008. Benthic Foraminifera as ecological indicators for  
172 water quality on the Great Barrier Reef. *Estuarine Coastal and Shelf Science*  
173 78:763-773.
- 174 17. van Woesik, R., T. Tomascik, and S. Blake. 1999. Coral assemblages and physico-  
175 chemical characteristics of the Whitsunday Islands: evidence of recent  
176 community changes. *Marine and Freshwater Research* 50:427-440.
- 177 18. Witt, V., C. Wild, and S. Uthicke. 2011. Effect of substrate type on bacterial  
178 community composition in biofilms from the Great Barrier Reef. *FEMS*  
179 *Microbiology Letters* 323:188-195.
- 180  
181
