# Supplementary material
Source: PubMed Central journal article supplement (PMC3485736)
Supplement: AEM.01623-12_zam999103774so2.pdf [file AEM.01623-12_zam999103774so2.pdf]

## Supplementary Tables

Supplementary Table S1. Location of sites in the Whitsunday Islands, central Great Barrier Reef, Queensland, Australia with GPS coordinates, location category (inner or outer nearshore), distances to shore, and depths where biofilm samples were deployed. Sampling and replication at each island and method of analysis is shown. Double Cone Is. was excluded as according to the water quality data we cannot clearly categorise this as an inner or outer nearshore island.

| Site        | Nearshore location (distance from coast in km) | Coordinates                | Depth (m) | Clone library                   | T-RFLP                                                                             |
|-------------|------------------------------------------------|----------------------------|-----------|---------------------------------|------------------------------------------------------------------------------------|
| Pine        | inner (5)                                      | S20°22.679'<br>E148°53.302 | 6         | dry 2008<br>wet 2009<br>n = 162 | dry 2008/09<br>wet<br>2009/10                                                      |
| Daydream    | inner (3)                                      | S20°15.345'<br>E148°48.729 | 6         | dry 2008<br>wet 2009<br>n = 171 | n = 24<br>dry 2008/09<br>wet                                                       |
| Double Cone | inner (10)                                     | S20°06.295'<br>E148°43.305 | 6         | n.a.<br>n.a.<br>n.a.            | 2009/10<br>n = 24<br>dry 2008/09                                                   |
| Edward      | outer (37)                                     | S20°14.693<br>E149°10.302  | 6         | dry 2008<br>wet 2009<br>n = 166 | wet<br>2009/10<br>n = 24                                                           |
| Deloraine   | outer (31.25)                                  | S20°09.457'<br>E149°04.183 | 6         | dry 2008<br>wet 2009<br>n= 166  | dry 2008/09<br>wet<br>2009/10<br>n = 24<br>dry 2008/09<br>wet<br>2009/10<br>n = 24 |

Supplementary Table 4. Results of PERMANOVA analysis of 16S rRNA T-RFLP data using two groups location (inner and outer nearshore) and season (wet and dry) (A) and posthoc test for the interaction term using two groups (B) of bacterial biofilm assemblages. Tests are based on 9999 permutations. P (MC): P value based on Monte Carlo random draws. P-values < 0.05 are highlighted for clarity.

A) Overall PERMANOVA of location and season

| Source   | Df | SS                     | MS     | Pseudo-F | P (MC)         |
|----------|----|------------------------|--------|----------|----------------|
| Location | 1  | 9232.2                 | 9232.2 | 3.646    | <b>0.0018*</b> |
| Season   | 1  | 16235                  | 16235  | 6.412    | <b>0.0001*</b> |
| L x S    | 1  | 7084                   | 7084   | 2.798    | <b>0.0107*</b> |
| Residual | 92 | 2.33 x 10 <sup>5</sup> | 2531.9 |          |                |
| Total    | 95 | 2.66 x 10 <sup>5</sup> |        |          |                |

B) Posthoc tests within the interaction term (season within location)

| Dry/wet |        |                |
|---------|--------|----------------|
| Groups  | T      | P (MC)         |
| Inner   | 2.2361 | <b>0.0002*</b> |
| Outer   | 2.0197 | <b>0.0031*</b> |

C) Posthoc tests within the interaction term (location within season)

| inner/outer |        |                |
|-------------|--------|----------------|
| Groups      | T      | P (MC)         |
| Dry         | 1.8562 | <b>0.0115*</b> |
| Wet         | 1.7241 | <b>0.0109*</b> |

Supplementary Table 5. Distance-based linear model (DistLM) marginal tests based on permutation procedures (9999 permutations) showing the % variance of single water quality parameters: temperature, salinity, dissolved organic carbon (DOC), dissolved inorganic nitrogen (DIN), total suspended solids (TSS), chlorophyll *a* (Chl *a*) and Secchi depth.

Residual degrees of freedom (df) = 116.

| Variable     | SS (trace) | Pseudo-F | P-value | % Variance |
|--------------|------------|----------|---------|------------|
| Temperature  | 16418      | 5.90     | 0.0001  | 4.84       |
| Salinity     | 13574      | 4.84     | 0.0001  | 4.00       |
| DOC          | 22692      | 8.32     | 0.0001  | 6.69       |
| DIN          | 10609      | 3.74     | 0.0006  | 3.13       |
| Chl <i>a</i> | 22282      | 8.16     | 0.0001  | 6.57       |
| TSS          | 15416      | 5.53     | 0.0001  | 4.55       |
| Secchi depth | 9545.2     | 3.36     | 0.0016  | 2.82       |
