# Supplementary material
Source: PubMed Central journal article supplement (PMC3485736)
Supplement: AEM.01623-12_zam999103774so3.pdf [file AEM.01623-12_zam999103774so3.pdf]

Supplementary Table 2. Summary of analyses from the water column, irradiance variables and nearshore location from the coast. Water quality parameters for each season shown are dissolved inorganic nitrogen (DIN, includes NO<sub>3</sub>, NO<sub>2</sub> and NH<sub>4</sub>), dissolved organic carbon (DOC), salinity, Secchi disc depth, total suspended solids (TSS), chlorophyll *a* (Chl *a*) and temperature. Mean (standard deviation).

| Island      | Nearshore location | Season | DIN (μmol l <sup>-1</sup> ) | DOC (μmol l <sup>-1</sup> ) | Salinity (ppt)  | Secchi depth (m) | TSS (mg l <sup>-1</sup> ) | Chl <i>a</i> (μg l <sup>-1</sup> ) | Temperature (°C) |
|-------------|--------------------|--------|-----------------------------|-----------------------------|-----------------|------------------|---------------------------|------------------------------------|------------------|
| Pine        | inner              | dry    | 0.21<br>(0.02)              | 60.13<br>(2.52)             | 35.71<br>(0.59) | 3.75<br>(1.73)   | 3.45<br>(0.21)            | 0.48<br>(0.09)                     | 23.90<br>(1.08)  |
|             |                    | wet    | 0.63<br>(0.06)              | 70.74<br>(1.00)             | 33.60<br>(0.60) | 7.50<br>(2.70)   | 2.85<br>(0.20)            | 0.82<br>(0.02)                     | 28.95<br>(1.00)  |
| Daydream    | inner              | dry    | 0.22<br>(0.07)              | 60.13<br>(2.34)             | 35.70<br>(1.20) | 4.10<br>(1.23)   | 2.71<br>(0.45)            | 0.47<br>(0.04)                     | 24.25<br>(2.19)  |
|             |                    | wet    | 0.52<br>(0.23)              | 75.4<br>(2.19)              | 33.35<br>(0.22) | 6.80<br>(3.01)   | 2.03<br>(0.40)            | 0.90<br>(0.17)                     | 29.5<br>(1.92)   |
| Double cone | inner              | dry    | 0.22<br>(0.10)              | 63.47<br>(4.47)             | 35.20<br>(0.32) | 5.50<br>(2.10)   | 1.50<br>(0.31)            | 0.33<br>(0.09)                     | 23.25<br>(2.93)  |
|             |                    | wet    | 0.48<br>(0.13)              | 62.81<br>(2.25)             | 33.60<br>(1.11) | 5.52<br>(1.21)   | 1.55<br>(0.46)            | 0.94<br>(0.12)                     | 29.35<br>(3.21)  |
| Deloraine   | outer              | dry    | 0.09<br>(0.03)              | 69.40<br>(2.11)             | 35.12<br>(2.19) | 7.75<br>(2.93)   | 1.50<br>(0.21)            | 0.29<br>(0.06)                     | 22.60<br>(1.90)  |
|             |                    | wet    | 0.17<br>(0.09)              | 70.60<br>(3.71)             | 35.10<br>(4.10) | 9.25<br>(3.00)   | 1.14<br>(0.73)            | 0.60<br>(0.09)                     | 28.80<br>(0.96)  |
| Edward      | outer              | dry    | 0.06<br>(0.01)              | 69.15<br>(2.43)             | 35.05<br>(1.70) | 8.00<br>(4.08)   | 1.35<br>(0.23)            | 0.36<br>(0.08)                     | 22.55<br>(1.92)  |
|             |                    | wet    | 0.24<br>(0.07)              | 69.15<br>(2.00)             | 34.85<br>(2.12) | 7.50<br>(2.31)   | 1.85<br>(0.27)            | 0.49<br>(0.12)                     | 28.60<br>(2.34)  |
