# Supplementary material
Source: PubMed Central journal article supplement (PMC3485736)
Supplement: AEM.01623-12_zam999103774so4.pdf [file AEM.01623-12_zam999103774so4.pdf]

Supplement Table S3. Terminal restriction fragments (T-RFs) are shown with their size (bp), relative abundance % (sd) at each location (inner and outer nearshore), phylogenetic affiliation (as classified using the greengenes batch sequence classifier [<http://greengenes.lbl.gov/cgi-bin/nph-classify.cgi>] using the NCBI taxonomy) and accession number as derived from the 16S rRNA gene clone libraries from each location.

16S rRNA identification of the nearest phylogenetic neighbour with accession number and sequence similarity (%) to each corresponding T-RF as determined by BLAST from the Greengenes database are shown.

| T-RF size (bp)             | Clone and accession number   | Relative abundance at each location % (sd) |              | Nearest relative with accession number              | Sequence similarity (%) |
|----------------------------|------------------------------|--------------------------------------------|--------------|-----------------------------------------------------|-------------------------|
|                            |                              | inner                                      | Outer        |                                                     |                         |
| <b>Alphaproteobacteria</b> |                              |                                            |              |                                                     |                         |
| 402                        | Rhodobacteraceae (JQ726916)  | 9.02 (2.54)                                | 30.21 (1.90) | Maribius sp. str. UDC481 (HM032012.1)               | 94.6                    |
| 400                        | Rhodovulum (JQ726908)        | 13.74 (3.54)                               | 27.36 (3.58) | Rhodovulum sp. str. SMB1 (DQ868668.1)               | 91.8                    |
| 401                        | Roseobacter (JF261782)       | 10.54 (3.58)                               | 12.32 (5.55) | Roseobacter sp. str. DSS-8 (AF098493.1)             | 99.2                    |
| 113                        | Erythrobacter (JQ726904)     | 12.27 (3.27)                               | 7.74 (1.23)  | Erythrobacter sp. str. DG1288 (DQ486501.1)          | 99.3                    |
| 404                        | Pseudorugeria (JF261850)     | 10.46 (2.56)                               | 3.91 (0.51)  | Pseudorugeria sp. str. HD-43 (FJ374173.1)           | 94.9                    |
| <b>Gammaproteobacteria</b> |                              |                                            |              |                                                     |                         |
| 116                        | Alteromonas (JQ727104)       | 17.46 (3.31)                               | 10.46 (3.31) | Alteromonas sp. str. UST981101-018 (EU982327.1)     | 99.4                    |
| 451                        | Aestuariibacter (JQ726913)   | 2.74 (0.42)                                | 1.72 (0.35)  | Aestuariibacter halophilus str. JC2043 (AY207503.1) | 95.8                    |
| 115                        | Microbulbifer (JQ726945)     | 2.36 (0.01)                                | 6.27 (0.12)  | Marine str. HTCC2188 (AY386344.1)                   | 95.0                    |
| 87                         | Neptunomas (JQ727205)        | 21.13 (0.71)                               | 7.31 (0.71)  | Oleiphilus messinensis ME102 (AJ295154.1)           | 90.9                    |
| 95                         | Oceanospirillum (JQ727083)   | 12.3 (8.16)                                | 7.63 (5.55)  | Oceanospirillum sp. str. P95 (EU195939.1)           | 90.9                    |
| <b>Deltaproteobacteria</b> |                              |                                            |              |                                                     |                         |
| 126                        | Desulfuromonas (JQ727081)    | 2.45 (0.30)                                | 1.38 (0.21)  | Marine sediment clone (GU302422.1)                  | 98.2                    |
| 127                        | Desulfomonile (JQ727190)     | 4.53 (0.47)                                | 2.47 (0.55)  | Tidal flat sediment clone MSB-1B5 (EF125392.1)      | 99.2                    |
| <b>Bacteroidetes</b>       |                              |                                            |              |                                                     |                         |
| 55                         | Flavobacteriaceae (JQ726884) | 21.77 (12.37)                              | 11.96 (4.49) | Aquimarina sp. str. antisso-27 (FJ882164.2)         | 98.1                    |
| 58                         | Flexibacteraceae (JQ727194)  | 9.88 (3.31)                                | 6.66 (2.69)  | Flexibacter aggregans str. IFO 15974 (AB078038.1)   | 91.1                    |
| 507                        | Cytophaga (JQ727183)         | 7.65 (1.28)                                | 2.13 (0.75)  | Cytophaga sp. 50.n (AB013834.1)                     | 85.1                    |

|                      |                            |              |              |                                                         |      |
|----------------------|----------------------------|--------------|--------------|---------------------------------------------------------|------|
| 106                  | Flexibacter (JQ727172)     | 27.69 (6.47) | 20.31 (4.47) | Flexibacter sp. str. SH9.43.1 (AB265187.1)              | 85.0 |
| 512                  | Marinicola (JQ726893)      | 4.31 (1.93)  | 4.86 (1.50)  | Marinicola seohaensis str. SW-152 (AY739663.1)          | 90.2 |
| 109                  | Microscilla (JQ727102)     | 16.31 (3.92) | 3.68 (0.49)  | Fulvivirga kasyanovii (AB433335.1)                      | 94.1 |
| 105                  | Muricauda (JQ726911)       | 16.69 (0.84) | 2.46 (0.82)  | Muricauda sp. str. 2PR55-3 (EU440997.1)                 | 93.4 |
| 107                  | Roseivirga (JQ727140)      | 38.24 (0.19) | 3.85 (0.19)  | Roseivirga ehrenbergii str. UDC351 (GQ246639.1)         | 90.1 |
| 56                   | Flavobacteria (JQ727050)   | 12.0 (4.01)  | 7.61 (2.49)  | Winogradskyella sp. str. 022-2-26 (FJ595484.1)          | 93.4 |
| 168                  | Gelidibacter (JQ727110)    | 8.21 (2.30)  | 2.31 (0.87)  | Deep-sea sediment clone BD2-17 (AB015545.1)             | 94.3 |
| 111                  | Gaetbulibacter (JQ726897)  | 39.71 (1.85) | 12.93 (1.85) | Owenweeksia hongkongensis str. UST20020801 (AB125062.1) | 89.6 |
| 114                  | Winogradskyella (JQ726903) | 17.79 (8.72) | 5.69 (2.76)  | Winogradskyella sp. str. DPG-24 (HM368527.1)            | 97.4 |
| <b>Cyanobacteria</b> |                            |              |              |                                                         |      |
| 456                  | Synechococcus (JQ726906)   | 11.84 (3.87) | 13.73 (3.87) | Synechococcus sp. str. PCC 8806 (AF448077.1)            | 91.1 |
| 454                  | Synechocystis (JQ726891)   | 15.12 (2.68) | 21.85 (8.68) | Synechocystis sp. str. PCC 6308 (AB039001.1)            | 91.7 |
| 457                  | Leptolyngbya (JQ726882)    | 5.90 (2.82)  | 11.74 (4.48) | Limnothrix sp. str. B15 (GQ848190.1)                    | 91.0 |
| 453                  | Phormidium (JQ726931)      | 7.63 (0.46)  | 11.43 (3.49) | Phormidium pristleyi ANT.PROGRESS2.6 (AY493585.1)       | 90.1 |
| 459                  | Prochlorothrix (JQ726928)  | 12.97 (1.75) | 18.97 (7.04) | Acanthopleuribacter pedis str. NBRC 101209 (AB303221.1) | 91.3 |
| <b>Diatom</b>        |                            |              |              |                                                         |      |
| 464                  | Gyrosigma (JQ726985)       | 10.82 (3.45) | 5.65 (0.83)  | Amphiprora paludosa str. CCMP 125 C52 (FJ002240.1)      | 98.9 |
| 462                  | Lauderia (JQ726883)        | 12.14 (4.51) | 11.83 (4.03) | Skeletonema pseudocostatum str. CSIRO CS-76             | 99.7 |
| 524                  | Thalassiosira (JQ726963)   | 0            | 2.59 (0.64)  | Aureoumbra lagunensis str. CCMP 1507 (GQ231542.1)       | 94.0 |
| 508                  | Navicula (JQ727023)        | 15.73 (4.31) | 0            | Navicula sp. C21 (FJ002227.1)                           | 98.6 |
| 460                  | Nanofrustulum (JQ727026)   | 6.59 (2.19)  | 3.06 (1.49)  | Fucus vesiculosus (DQ307678.1)                          | 96.7 |
| 468                  | Codium (JQ727051)          | 0            | 18.91 (2.67) | Rickettsia sp. str. IO1 (AF394906.1)                    | 72.8 |

|     |                           |              |              |                                                            |      |
|-----|---------------------------|--------------|--------------|------------------------------------------------------------|------|
| 461 | Haslea (JQ726946)         | 20.03 (7.90) | 12.83 (2.36) | Fucus vesiculosus (DQ307678.1)                             | 96.8 |
|     | <b>Firmicutes</b>         |              |              |                                                            |      |
| 270 | Carboxythermus (JF261862) | 12.81 (6.21) | 0            | Thermosinus carboxydivorans str. Nor1<br>(AAWL01000009.1)  | 77.8 |
|     | <b>Acidobacteria</b>      |              |              |                                                            |      |
| 272 | Terriglobus (JQ726928)    | 4.13 (0.41)  | 0            | Acanthopleuribacter pedis str. NBRC 101209<br>(AB303221.1) | 91.3 |
|     | <b>Unidentified</b>       |              |              |                                                            |      |
| 79  |                           | 0            | 3.82 (0.43)  |                                                            |      |
| 80  |                           | 0            | 1.82 (0.25)  |                                                            |      |
| 84  |                           | 0            | 4.39 (1.72)  |                                                            |      |
| 88  |                           | 0            | 1.98 (0.08)  |                                                            |      |
| 149 |                           | 3.52 (1.02)  | 0            |                                                            |      |
| 267 |                           | 10.02 (0.38) | 0            |                                                            |      |
| 290 |                           | 9.87 (1.24)  | 12.95 (5.52) |                                                            |      |
| 292 |                           | 4.12 (0.78)  | 8.30 (3.91)  |                                                            |      |
| 295 |                           | 0            | 27.90 (9.88) |                                                            |      |
| 442 |                           | 12.01 (3.90) | 12.68 (6.12) |                                                            |      |
| 451 |                           | 6.23 (1.04)  | 5.53 (2.25)  |                                                            |      |
| 452 |                           | 15.87 (4.65) | 0            |                                                            |      |
